# Supplementary material for: Exploring the nexus between social and environmental sustainability within EU organic agriculture: a systematic literature review
Source: Frontiers journal article supplement (doi:10.3389/fsufs.2024.1502085), 2024-12-12
Supplement: Table_1.xlsx [file Table_1.xlsx]

## Sheet: Final body of literature
Author	Title	Year	Journal/Book	Discipline	Type	Geographic focus	Method	Quiery	Scope	Results and conclusion	Theory	Recommendations
Aubert and Enjorlas (2017)	French labour-force participation in organic farming	2017	Human Systems Management 36 (2017) 163–172	Management studies	Empirical	France	Descriprive statistics and econometric model	"Organic farming" AND "employment conditions"	Analysis of the essential contribution of labour force - holder, family and employees - on the adoption of organic farming	Results emphasize that organic famirng translates into different labour patterns which highlight participants involvement and their degree of qualification and experience. First main results is the positive influence of employees on the adoption of organic farming. Results also underline that farms are less likely to adopt organic farming certification when they are diversified. Finally, certific…	Organic farming mainly considered through the adoption of environmentally freindly behavior. This strategy can take several forms including the reduction of applications and quantities of phytosanitarity products. But few studies have tired to consider labour as a topic itsleft although authors have show that organic farming requires more labour and more waged labour than conventional organic far…	Results highligh the existence of labour force patterns within organic farming. It would be of interest to extend the analysis towards a more pricesi analysis of waged workforce in order to grasp more precisely which skills are needed by organic farms. In terms of public policies, this isseus appears of great interest given the increasing trend of farms willing to convert to this type of practice…
Berbec et al.	Assessing the sustainability performance of organic and low-input conventional farms from eastern Poland with the RISE Indicator System.	2018	Sustainability Vol.10 (6)	Public Health Nutrition	Empirical	Poland	Evaluation of sustainability assessment tool	"Organic agriculture" AND"wages"	The aim of this study was to examine the sustainability performance of organic and low-input conventional farms with the sustainability assessment tool—RISE 3.0. It is an indicator-based method for holistic assessment of sustainability of agricultural production at farm level	The presented study showed that according to RISE evaluation, there are not many differences in sustainability among organic and conventional (traditional) farms in Lublin province. Significant differences were found only for the biodiversity theme and for two indicators: greenhouse gas balance and intensity of agricultural production. Other themes and indicators were at similar level in both far…	The RISE 3.0 (the Response-Inducing Sustainability Evaluation) is an indicator-based method for holistic assessment of sustainability of agricultural production at farm level. High scores stand for farms that create and maintain an environmental, economic, and social buffering capacity and that maintain or increase the productivity of its natural, financial, and human capital. According to the RI…	The main features of organic farming system that makes it more sustainable than conventional systems were higher soil organic matter content, which results in better soil quality and higher level of available water resources; lower inputs of fossil energy; higher labour inputs, which were more evenly distributed in time; reduced soil erosion and fewer diseases due to better crop rotation and cove…
Bouttes et al.	Conversion to organic farming increases dairy farmers’ satisfaction independently of the strategies implemented	2020	Agronomy for Sustainable Development	Agronomy	Empirical	France	Survey	"Organic agriculture" AND "working conditions"	Our objective was to investigate whether and how farmers could improve their satisfaction during the conversion to organic.	Satisfaction was assessed by farmers regarding economic, agronomic, livestock-related, and social aspects as well as work conditions. All observed conversion strategies were oriented towards pasture-based grazing systems and a reduction in land use and herd management intensities. It was not possible to relate specific conversion strategies to specific changes in patterns of satisfaction. This st…	Conversion to organic can be regarded as a specific case of transition. I.e. the process by which principles governing a system are radically revisited, resulting in changes of both the values of actors and their practices. Several studies have analysed farm transitions through the lens of changes in farming practices. The main limitation of these sources is that they do not relate changes in far…	When supporting farmers considering a conversion, local advisers may consider farmers’ objectives and their potential satisfac- tion regarding their achievements beyond the risks of not obtaining the organic price for products immediately.
Bradut et al.	The sustainable development of agriculture in the context of Romania's accession to the European Union	2017	Surveying Geology and Mining Ecology Management	Management studies	Review	Romania	Narrative review	"Organic agriculture" AND "Employment conditions"	Analysis of the most relevant challenges Romania started facing after joining the Eueopean Unoon: austerity measures, occurrence of climate change that affects sustainable agriculture. The article explores how this framework, leaded to the acceleration of the economic growth.	Recognition of the strategic role played by sustainable development in Romania as a way for the recovery of the Romanian economy and in this context, sustainable agriculture has an essential role. Sustainable development of rural economy is based on the need to develop rural economu, ensure alternative incomes and a higher standard of living for farmers, protecting environment and ensuring the ex…	Evolution and debate around the concept of sustaiable development and how it has been materialized in time, in a period of several decades.	Sustainable sgriculture is an activity and a concept to be put in practice as a solution for the sustainable economic development. It is proving to be a viable alternative to intensie agriculture, its role being to promote environmentally friendly systems and technologies that are respectful of the needs of future generations to develop harmoniously.
Brigance et al.	The menthal health of the organic farmer. Phychosocial and contextual actors.	2018	Workplace health and safety	Psychology	Empirical	EU countries	Qualitative descriptive study through interviews	"Organic agriculture" AND "Occupation"	The purpose of this qualitative descriptive study was to explore the psychosocial and contextual factors that may relate to the mental health of the organic farmer. Key informant interviews were conducted with 10 farm producers and 20 farm workers.	The findings indicated that respondents recognized mental health as influential in the workplace and the future of organic practices (e.g., the mental, financial, physical stress). Some of the risk factors mentioned by participants reflected those experiencedby conventional, nonorganic farmers. Participants also reported contentment with farming as an occupation, the benefits of being connected t…	Many interpersonal and exxternal factors may contribute to job-related injury and illnes, including psychological disorders. Work environment can affect performance and generate both physical and mental stressors thau may lead to occupational injury and illness. Farmers in particular confront a variety of psuchosocial and contexual issues that may affect their mental health and compromise their s…	Further research is needed to explore whether the results of this study apply to the organic farmer across differing demographics and geography (males vs. females, rural vs. urban) and how the organic farmer compares to the conventional agricultural worker.
Briz et al.	Knowledge and skills attractive for the employers of the organic sector: A survey across Europe	2019	Renewable agriculture and food systems	Public Policy	Empirical	7 EU countries	Survey	"Organic farming" AND "employment conditions"	The scope of the research was to evaluate the employment market for the organic agricultural industry in Europe.	Results indicate the willingness to employ qualified graduates. From the employers’ perspective, the most desirable knowledge skills among the graduates of organic agricultural studies include plant production, food quality and plant protection. Further, the study revealed the work skills most desired by the employers are practical expert- ise, teamwork and problem-solving, and the most important…	We present an innovative study to provide the point of view of stakeholders toward employing qualified graduates in their companies. To our knowledge, this study is the first time organic agriculture industry stakeholders (employers) across Europe have answered questions related to issues about the appropriateness of current agricultural education and training for employment in the organic agricu…	Teaching methods should be adapted to the needs of the stakeholders (employers) and innovative tools are necessary. It is important to increase cooper- ation with companies or other representatives of the organic sector, and to learn by defining and solving problems in order to have a broader understanding of the situation. This can be a challenge for current study programs of all levels across E…
Burgeois et al.	Transmission and Individuation in the workplace	2015	Francophone Perspectives of Learning Through Work (book)	Psychology	Empirical	Belgium and France	Qualitative descriptive study through interviews	"Organic agriculture" AND "occupation"	The chapter aims at better understanding what conditions and through what processes does transmission in a given occupation allow for individuation (instead of mere reproduction).	The first study focuses on the transmission process with experienced farmers who are converting to organic farming in Belgium and in France. This study highlights mainly “macro” factors of individuation.	Inidividuation understood as the process through which nocives in an occupation gradually find their own personal way of thinking and doing things while incorporating the knowledge and practices being transmitted to them by the reference model. This view is based mainly on the French concept of “subjectivation,” as elaborated by Richard and Wainrib. In educational contexts, individuation implies …
David et al.	Long term strategies and flexibility of organic farmers in Southern-Eastern France	2010	International Journal of Agricultural Sustainability	Sustainable agricultural practices	Empirical	France	Long-term survey	"Organic farming" AND "employment conditions"	Drawing upon a detailed case study of nine organic farms followed up over the course of 14 years, this paper argues that different forms of farm flexibility employed during and since this period have allowed farms to remain viable	It concludes that the diversification of farm production and activities, off-farm employment and farm household commitment to organic agriculture, together with professional membership and social networking, contribute significantly to farm viability. Finally, this paper draws up different farm strategies to support the local development of organic agriculture.	The study conceptualizes different dimensions od flexibility as linked to the capacity for adaptation or for the reaction of a systme in a situation of uncertainty. This term is used in various ways to describe the scale, the type and the subjects concerned. Some authors focus on flexibility as the management of production factors (i.e. capital and labour). Other dimensions are also used by numer…
Di Vita et al.	Can sustainability match citrus fruit growing production? An energy and economic balance of agricultural management models for “PGI Clementine in Calabria	2018	Agronomy Research	Agronomy	Empirical	Italy	Evaluation of economic results; Input-output energy analysis	"Organic farming" AND "employment conditions"	The scope of the paper was to evaluate the environmental and economic effects of different agricultural management models for quality citrus fruit production.	Results show that in the presence of EU subsidies, organic farming is more profitable than other systems due to higher sales price of organic PGI clementines, which allow producers to obtain the highest remuneration for the capital. Results have interesting implications for rural and local development because the outcome shows that putting more effort into the development of sustainable practices…	The methodological approach adopted, lies on the economic and energy sustainability of each production system and was assessed by accounting the farm net value of farms in terms of direct and indirect sources and in terms of renewable and non-renewable energy sources.	Regarding FNV, the results show that in the presence of European subsidies, organic farming (with 6.06 ha-1) is more profitable than other systems (4.33 ha-1 for integrated farming and 4.99 ha-1 for conventional farming) due to the higher sales price of organic PGI clementines, which allow producers to obtain the highest remuneration for their capital (1.65 B/C organic, 1.48 B/C integrated, 1.61 …
Dias et al.	Building Bio-Districts or Eco-Regions: Participative Processes Supported by Focal Groups.	2021	Agriculture	Sustainable agricultural practices	Empirical	Italy; Portugal	Qualitative exploratory approach	"Organic farming" AND "employment conditions"	The overall aim was to understand and establish a set of guidelines based on agroecology and participatory methodologies to support the design of Eco-regions. The article was aimed at exploring the actors that are involved in the process of building a bioregon and what is their role and contribution. A second objective was to analyse the governance model and processes to be considered mst relevan…	For the first object, results showed that farmers are the pillar of eco-regions. They are those who guarantee the quality of the products, the promotion of sustainability, the preservation of the soil, of biodiversity and of landscapes. Farmers are the main stakeholders, they can join multi-functional touristic activities were they can sell products and increase their income. For the second scope…	Focus on existing literature regarding eco-regions that are aimed at promoting a biological and agroecological model within the framework of ethical, fair and solidarity rural development valuing natural and typical products in their territoryof origin, and contributing to the economic and tourist development based on respect and valorization of local resources. Analysis on social, economic and e…	Recommendation based on the empirical research suggest that Bio‐district or Eco‐region should be informal, bottom‐up, with farm‐ ers as the main pillar, with a fair and representative participation, namely family farmers.
Dumont and Baret	Why working conditions are a key issue of sustainability in agriculture? A comparison between agroecological, organic and conventional vegetable systems.	2017	Journal of Rural Studies	Interdisciplinary (theorical frameowork links sociology, economy and agronomy)	Empirical	Belgium	Mixed-methods apporach (interviews; collection of techno-economic data)	"Organic agriculture" AND "employment conditions"	In order to improve working conditions in alternative systems, such as agroecological systems, we need a better understanding of the advantages and difficulties of working in these systems in the present context. This study was carried on with this objective in mind. It aims to build bridges between normative and empirical studies in agroecology.	Overall the article identifies four key issues. First, working conditions were not necessarily better for producers in systems that put more emphasis on ecological values. The socio-economic viability of three production systems, including agroecological market gardening on small areas of land, is insufficient. Second, workers in all systems, except in one agroecological system, experience poor e…	We examine a sample of 41 conventional, organic and agroecological vegetable producers who provide fresh produce for markets exploring their working conditions and the employment conditions of their workers, in Wallonia (Belgium). Drawing on the sociological, economic and agricultural literature, we identify nine dimensions that determine working conditions: leeway and control level; income and s…	This approach has shown what researchers, associations and governments need to focus on if they really want to improve working conditions in sustainable agriculture. Some sociologists defend that the setting of standards is likely to be necessary in order to improve poor working conditions, especially for farm workers but they are likely to not be effective unless the socio-economic and political…
Farreras and Salvador	Why do some Participatory Guarantee Systems emerge, become effective and are sustained over time, while other fail? An application of the Ostrom social-ecological system framework.	2022	Land Use Policy	Public Policy	Empirical	EU countries	Appliation of Conceptual framework of Socio-Ecological Systems designed by Elinor Ostrom	"Organic agriculture" AND "employment conditions"	Explore biophysiscal, social and economic conditions of the Socio-Ecological Systmes (SES) that affect the likelihood of building these institutions through collective action. The assumption is that underlying biophysical, social and economic conditions of SES is what ffects the likelihood of building these institutions through collective action.	The main contribution of this study is the adaptation of Ostrom’s SES framework in order to understand the challenges that underlying conditions of the SES can pose to PGS, and the collective action that created them. This approach allowed the identification of variables that ease groups to self-organize to build and keep PGS over time. The analysis also shows that the variables identified in thi…	In order to explore these dimensions, the article adopted a conceptual framework of SES designed by Elinor Ostrom to identify the conditions under which Participatory Guarantee Systems, and the collective action that create them, emerge, become effective and are sustained over time.	The analysis shows the relevance of strengthening research activities focused on identifying the conditions under which PGS enable the enhancement of social and ecological performance of different types of SES. The strengthening of research activities can also be useful for addressing ecological ruptures like COVID-19. Given their rooted presence in the territory, PGS may be less affected by inte…
Ferasso et al.	Territorial Analysis of the European Rural Development Funds (ERDF) as a Driving Factor of Ecological Agricultural Production	2021	Agriculture	Policy Evaluation	Empirical	EU countries	Regional evaluati+I13on of two packages of the European Agricultural Fund for Rural Development	"Organic farming" AND "employment conditions"	The aim of the study is to carry out a regional evaluation of the effects on production and employment that were generated in the Spanish organic farming sector.	The application of the shift-share methodology showed the existence of important differences in the levels of development of organic farming in Spain. In both prediction models, the negative effect that the recent economic and health crisis produced by COVID-19 had on production during 2020 was evidenced. However, there is an important tendency to regain the importance of the sector during the ye…	To determine the level of territorial development, the shift-share methodology was used in this research. wo prediction models were applied to predict the level of development of the sector in the near future, with a time horizon of 2023. These calculations were made at the national level and the data was disaggregated by the types of crops, specifically: cereals, legumes, and others; vegetables …	Necessary to identify the regions that are lagging regarding the implementation of a sustainable growth model and to promote in them the projects that contemplate this environmental dimension. Otherwise, the environmental differences at the territorial level could increase. To this end, the recently approved European Fund can undoubtedly produce important changes in the sector.
Florea et al.	An analysis of the influencing factors of the Romanian Agriculutral Output within the Context of Green Economy.	2021	Sustainability	Public Policy	Empirical	Romania	Quantitavie methods (mathematical regression and correlation matrix) and qualitative methdos (SWOT matrix for the agricultural sector)	"Organic farming" AND "employment conditions"	The objective of this study is to analyze the trends in agriculture and the factors affecting the output of agriculture (OA) in the EU and Romania in the context of green economy.	The results showed that there is a direct and positive relationship between the OA and its influencing factors. Moreover, it revealed the negative relationships between the employees in agriculture ( 0.58), air pollutants ( 0.49), agriculture land ( 0.42), irrigation norm ( 0.39), agriculture training ( 0.33) and the OA, and positive relationships between the area under organic farming (0.56), th…	The research used the quantitative (mathematical regression function, correlation matrix, and R-squared) and qualitative (the SWOT matrix of the agriculture sector in Romania) methods. The data on Romanian agriculture were gathered from Eurostat for the period of 2006–2019.	In conclusion, the influence of the internal and external factors considered in our analysis on the output of agriculture is high (R = 0.89); thus, the human, natural, ecological, economic, social, and technological factors are important in determining the strength of this correlation. These results, next to simulation and modelling, are very important tools in predicting the evolution of a depen…
Fullana Llinas et al.	Socio-ecological transition in a Mediterranean agroecosystem: What energy ows tell us about agricultural landscapes ruled by landlords, peasants and tourism (Mallorca, 1860-1956-2012)	2021	Ecological Economics	Ecological Economics	Narrative Review	Spain	Descriptive analysis through records, statistics and land-use maps	"Organic agriculture" AND "wages"	The aim of the study is to analyse the socioecological transition of agroecosystem in the municipality of Manacor (Spain), based on calculations of its funds and energy flows, and linking its fund-flow pattern with the evolution of their respective landscaes within the social and economic context of three different time-points stretching over 150 years. The aim is to emphasize two key features of…	The results show some similarities and many differ- ences between the agroecosystem’s performance in the traditional organic farming of 1860 and the mixed organic–industrial farming of 1956. A common feature was keeping the internal reinvestment of matter–energy, either as biomass reused or biomass left unharvested, comparable or larger than the nal product extracted. The intensi cation of peasan…
Hilal et al.	Organic and Geographical Indication Certifications' Contributions to Employment Education	2021	Journal of Agricultural and Food Industrial Organization	Policy Evaluation	Empirical	EU countries	Quantitative methods	"Organic agriculture" AND "wages"	The paper wants to test the extent to which Food Quality Certification Scemes (FQS) contribute to the social and economic sustainability of farmers and regions through employment and education.	The FQS products examined have a 13% higher labour usage (labour-to-pro- duction ratio) compared to reference products, indicating that they provide greater employment. Additionally, wage levels are 32% higher in FQS compared to references. Despite providing greater employment and higher wages, profitability of FQS (i.e. how much turnover/profit is generated per employee) is nevertheless 32% high…	To conduct this test, the article analyses the employment and educational outcome of 25 FQS	Results suggest that FQS can provide a strong contribution to local employment, employee income and business profits, strengthening the social and economic sustainability of producers and regions.
Jansen	Labour, Livelihoods and the Quality of Life in Organic Agriculture in Europe.	2000	Biological agriculture and horticulture	Sociology and Social Sciences	Narrative Review	EU countries	Descriptive analysis through records, statistics and land-use maps	"Organic farming" AND "employment conditions"	The paper addresses how the development of organic farming determines the use of, and is influenced by, a central human resource, labour. The question emerges if and how conversion to organic farming leads to changes in labour requirements and its effects on labour oeganization.	The central argument is that current studies of labour in organic agriculture rely too heavily on a narrow definition of labour as applied by farm economic approaches while a broader concept of labour would open up new crucial domains for investigation..	The article addresses these various questions with an explanatory review of existing literature. The first part deals with the differences between organic and conventional farming; the second part with qualitative changes in labour resulting from the conversion to organic agriculture. It can be concluded that the literature strongly suggests that organic farming requires more labour and has, pote…	The review shows that social differentiation is not being investigated with regard to organic farming and that a theoretical approach to this is missing. The article also suggest that empirical work in this field in the organic agricultural secotr as in conventional agriculture has still to be done.
Jetvic et al.	One Health Approach in Traditional Milk Production as a Part of Steps towards SDGs	2020	European Journal of Sustainable Development	Public Health Policy	Review	EEC countries	Narrative review	"Organic agriculture" AND "employment conditions"	The aim of the paperis to underline public health and sustainability significance of interconnection among agriculture, veterinary and technology.	Organic milk and cheese with added value are considered by consumers as a healthy and safer alternative. Production of hard cheese with added value from milk produced in organic and self-sustaining systems research the risks, advantages and possibilities of traditional cheese production. Farmers have been encouraged to consider the effects of intensification on farm biodiversity and importance of…	The research is focused on creating conditions for organic milk and hard cheese with added value production, with precisely defined conditions: isolating land plots, livestock farms and processing facilities from possible sources of pollution, water quality, harmonized development of plant and animal production and the capability of producers for organic agriculture with the obligation to constan…	Importance of developing a knowledge base on livestock biodiversity to help maintain local species and breeds that may otherwise become extinct.
Jouzi et al.	Organic Farming and Small-Scale farmers: main opportunities and challenges	2017	Ecological Economics	Ecological Economics	Review	EU countries	Narrative review	"Organic farming" AND "employment conditions"	The scope of the paper was to investigate the main opportunities and challenges of the food production system of small-scale farmers in developing countires withi an emphasis on their livelihoods.	The study showed that the most significant advantages of OF are environmental protection and a higher resilience to environmental changes, increasing farmers' income and reducing external input cost, enhancing social capacity and increasing employment opportunities. A s well as enhancing food security primarily by increasing the food purchasing power of local people. However, the main challenges …	The article lies on the exploration of the role of small-scale farmers in developing countries stressing their fundamental role especially in relation to food security. It addressess the main challenges of organic farming: including low yield, nutrient management difficulties, certification and market issues and educational and research problems.	Considering all the opportunities and challenges and despite the fact that OF might have some important challenges for small-scale farmers, it could/should still be considered as a part of the solution to improve their livelihood within an integrated approach which uses the best practices of different production systems. OF can be considered as an effective development strategy in order to reduce…
Konstantinadis	Assessing the socio-economic dimensions of the rise of organic farming in the European Union	2016	Review of Social Economy	Public Policy	Empirical	EU countries	Quantitative methods (relationship betweeen econmic indicatopr and share of organic farming in a region)	"Organic farming" AND "employment conditions"	The study explores the extent to which organic farming is associated with higher application of agricultural labour. Specifically the article assess the role of organic farming in the new rural and policy alndscape and it evaluates whether the increase in organic farming in EU confirms the claims of EU policy-makers regarding: 1) the connection between organic and small-scale farming; 2) the posi…	Results show a positive relation between average farm size in a region and the share of utilized agricultural area under organic methods. Moreover it shows how organic share of agriculture is not associated with higher application of labor per hectar of agricultural land.	Two main results. First, that ther is a positive relationship betweeen a region's share of organic land and the region's average farm size. Second, an increase in the share of agricultural area farmed under organic methods does not necessarily lead to higher application of labor per hectar in that region. In fact, organic farms use on average less labor than conventional farms.	These characteristics provide evidence in support of the hypothesis that it is larger farms that have mostly taken advantage of public support for organic farming, a conclusion consistent with the ‘conventionalization’ thesis, rather than with the claims of positive employment results and purported bene ts for small-scale farms emphasized by European policy-makers. The preceding sections cast dou…
Kozàkova et al.	Organic and conventional production in Slovakia: comparison of selected managerial and financial indicators.	2014	Potravinarstvo Slovak Journal of Food Sciences	Food Sciences	Empirical	Slovakia	Quantitative methods	"Organic farming" AND "employment conditions"	The aim is to measure the differences in the specifics of organic farming on a sample of more than 1050 large farms in Slovachia. The study formulated the following research hypotheses: 1) Number of employees per hectare is higher in the case of organic producers when compared to conventional producers. 2) Personal Costs per hectare are higher in the case of organic producers when compared to con…	Based on the results authors conclude that there is no statistically significant differences between conventional and organic farms over the whole observed period. The fact that organic farms have higher number of employees was confirmed in none of the years observed. Also higher personal costs of organic farms could not be confirmed. Organic farming in Slovakia does not generate increased labour…	The starting point is the literatue that analyzes the main characteristics of the organic sector according to which: a) personal costs in organic farming are higher than in convenitonal system because of higher requirements for manual work; organic armers need lower assets when compared to convetional farmers because the higher share of the manual work in case of organic farmers.	Further research should be focused on the differences between organic farms with respect to UAA. The average UAA of organic farms in our sample was 850 hectares. The absence of above described general specifics in Slovak organic farms included in our sample might be influenced by this fact.
Kröger and Schäfer	Between Ideals and Reality: Development and Implementation of Fairness Standards in the Organic Food Sector	2014	Journal of Agricultural and Environmental Ethics	Environmental Ethics	Narrative Review	Eu countries	Narrative review	"Organic agriculture" AND "wages"	The present article examines manifestations of fairness in terms of standard setting: What is the common ground of current organic–fair initiatives? Additionally, it seeks to shed light not only on how the initiatives define fairness, but also how their members practice it in everyday business: What is fairness all about in organic–fair initiatives and enterprises? What are the limitations and po…	Authors analysed a number of diverse approaches: a fixed-price premium, producer groups with long-term collective agreements, product-specific price negotiations within a co-operative and roundtables of suppliers and competitors for agreeing on fixed prices. These approaches differ quite a bit in terms of complexity and intensity of cooperation, but they do have something in common: initiatives a…	The article explores the number of reasons why organic-fair initiatives in central Europe have emerged in the past few years, by focusing also on the concepts of ethical consumerism and consumer preferences, while others have originated mainly from a desire to hold on to the ideals of the organic movement. It explores the theoretical approaches that are at the basis of the concept of fairness whi…	Organic fair initiatives have the potential to revitalise the original values of the sector and contribute significantly to ethical standardization therein. In order to make a substantial contribution to future development of the sector, a critical examination of aspects of internal fairness as well as the formulation of appropriate standards in this field is recommended.
Lecole	Can small French farms provide an opportunity for employment in the Agricultural sector	2021	EuroChoices	Public Policy	Narrative Review	France	Narrative review	"Organic farming" AND "employment conditions"	The aim of this work is to encourage reflection on the adaptation or the development of public support measures, which would better take into account the specific features of labour-intensive small farms and/or would target specifically the creation and maintenance of jobs on small farms. Our analysis focuses on agricultural employment and is based on the case of small French farms. In order to b…	The article provides an overview of main CAP's dynamics and intsruments and the overall role of small-scale farmers within French agriculture. It states that in 2010 in France there were around 179,000 small farms, representing over one third of all farms in mainland France and covering almost 7% of the total agricultural surface area and more than 13% of the total agricultural work units. Small …	Small farmers had diversification activities (processing, agritourism, leisure activities for example), sold part of their production in short distribution channels and/or produced under organic farming label standards. On the basis of labour regimes the article proposes a classification of small farms in eight different labour regimes à used in many modelling studies showing the effects of compl…	Policy recommendations: National French policy can grant farmers exemptions from employer contributions when hiring casual workers. Exemptions extended to permanent workers could be particu- larly relevant for small farms. In order to limit coordination difficulties, small farms may not be involved. Local councils, among others, finance the creation and development of employ- ers’ alliances. In o…
Lobley et al.	The contribution of organic farming to rural development: An exploration of the socio-economic linkages of organic and non-organic farms in England_x000D_	2009	Land Use Policy	Public Policy	Narrative Review	UK	Harrison's methodology (examining sets of farm accounts and tracing location of output sales)	"Organic farming" AND "employment conditions"	The paper seeks to contribute to the debate concerning the extent to which organic farming and organic farmers are embedded in, and contribute to, the development of the local economy.	The paper reveals some important distinctions between the characteristics of organic and non-organic farms and farmers. It is argued that most of these differences do not stem directly from differences in farming systems but, rather, reflect considerable differences in the people who operate organic farms as well as the distinctive business configurations they frequently adopt.	More recently, it has been argued that organic farming can provide rural development benefits through enhanced employment and through closer connections with the local economy, reconnecting consumers with producers and stimulating positive economic multipliers. Building on a methodology devel- oped by Harrison (1993) and modified by Errington and Courtney (2000) this paper presents spatialised da…	In confirmation of previous findings, organic farms are shown to employ more people, but the data reveal few differences between the local economic connections of organic and non-organic farms. In turn, this suggests that simply comparing organic and non-organic farm businesses is too blunt an approach. Instead, it is important to consider other factors such as the type of enterprises found on th…
Loncaric et al.	Economic aspects of agriculture in East Croatia	2008	Cereal Research Communication	Public Policy	Narrative Review	Croatia	Narrative Review	"Organic agriculture" AND "Occupation"	This paper is aimed to compare conventional and organic agriculture from economic point of view and to highlight the current situation in Croatian organic agriculture as basis for founded decision making.	Organic production in Europe in spite of lower yields, in general, is more profitable and perspective than conventional as a consequence of higher prices, adequate subsidies, increasing demand and positive public perception. Costs in absolute value are considerably higher, mostly as a result of higher labour (45% relatively) and fertilization costs (33%), while on conventional side fertilizers an…	Like in other transitional countries, Croatian agriculture is in crisis and Croatian conventional farmers are faced with serious problems in their production: unorganized market with constantly present redemption price problem, lack of competition on input market what affects high input prices (especially seed, fertilizers and pesticides), limiting factors for higher productivity and profitabilit…	Health, environment protection, better price and market position, as well as personal persuasion were marked as major reasons to step into organic farming. Although organic agriculture is inchoate and suffering “child diseases”, farmers are generally satisfied with their occupation. To improve situation on Croatian organic market it is necessary to improve input market, to educate public as well …
Lundqvist	Occupational Health and Safety of Workers in Agriculture and Horticulture	2001	New Solutions	Public Health Policy	Narrative Review	EU countries	Narrative Review	"Organic agriculture" AND "working conditions"	The contribution aims at exploring the dimension of occupational health within agriculture. How do the workers themselves feel about their work? It is always important to include the workers’ own opinions and not only judge the situations in the light of official statistics and measurements of environmental factors	The results showed that the workers considered the body postures, the use of pesticides, and the climate to be the worst factors. Other problems included stress and lengthy work operations.	The discussion about health and safety of workers in agriculture and horticulture will include not only the hired workforce, but also farm and horticultural business operators, and family workers.	The use of and access to information technology will lead to many improvements— including working conditions. The rapid development of an information society is expected to change the working conditions of the entire global work force during the next decade[GM1] . Despite increased attention of consumer to environmental impact of food products they buy, However, the present labels do not yet stat…
Maas et al.	Work in organic farming: an overview	2020	Ciencia Rural	Sociology and Social Sciences	Review	EU countries	Systematic Review	"Organic agriculture" AND "working conditions"	This review aimed to nd evidence that substantiates the improvement of the health and working conditions of farmers working with this model of agriculture.	After the exclusion, 11 documents remained for content analysis. Results of these studies indicated that when compared to conventional agriculture, there is an increase in cognitive load due to the variety of tasks; however, no mental su ering was identi ed. Despite the absence of appropriate technology and technical assistance, there is an increase in job satisfaction and an improvement of the h…	This review aimed to nd evidence that substantiates the improvement of the health and working conditions of farmers working with this model of agriculture. To this end, the ProKnow‐C instrument was used, which recommends seven steps to select and evaluate the publications found. Exclusion criteria included studies related to the consumption of these products, school feeding, management, and culti…
Mattila et al.	Determinants of Good Work Ability among Organic and Conventional Farmers in Finland	2020	Journal of Agricultural Safety and Health	Public Health Policy	Empirical	Finland	Survey + Telephone Interviews	"Organic agriculture" AND "Occupation"	The aim of this study was to explore if organic pro‐ duction has a positive effect on producers’ work ability while controlling for demographic and production characteristics.	Organic production had a negative effect on work ability, while larger farm size, experiencing economic uncer‐ tainty rarely/never/occasionally (vs. often), age under 55 years, having occupational health coverage, and experiencing low amounts of physical strain or mental strain had positive effects in a multivariable model.	This study used telephone interview data collected by the Finnish Institute of Occupational Health in 2014‐2015. The material consisted of 2,164 farmers: 231 in organic production and 1,933 in conventional production. Work ability was measured with a single question regarding the farmers’ current work ability compared with their lifetime best on a scale of 0 to 10, with 0 meaning unable to work. …
Medland	Working for Social Sustainability: Insights form a Spanish Organic Production Enclave	2016	Agroecology and Sustainable Food Systems	Sociology and Social Sciences	Empirical	Spain	Qualitative research through interviews	"Organic agriculture" AND "farmwork"	By engaging with the concept of the social sustainability of food systems, this article contributes to a discussion among critical food scholars, as many have articulated their analysis in relation to the notion of “social sustain‐ ability”. The study, therefore, seeks to contribute to knowledge of farmwork in organic agriculture via deepening understanding of how farmers, workers, and trade unio…	In this case, the study shows that organic agriculture has been accompanied by experiences of small social sustainability gains and opportunities for workers and farmers, in a particularly challenging context.	When perceived as a step in the direction of sustainability some authors have challenged the emergence of organic agriculture, and ethical trade more broadly. Such a characterization of “countermovement” may depend on the characterization of social actors such as farmers, or export companies or cooperatives, which, depending on the case in question, can be interpreted as actors with relatively mo…	During the last decade, consumers have become aware of the importance of producing food with environmentally friendly methods. Environmental labeling is one important aspect of this subject. One typical goal of an environmental labeling program is, according to EPA, to promote environmental improvement by encouraging consumers to choose products and services considered to be environ‐ mentally pre…
Mitloehner, Calvo	Worker Health and Safety in Concentrated Animal Feeding Operations	2008	Journal of Agricultural Safety and Health	Public Health Policy	Review	EU countries	Review	"Organic agriculture" AND "working conditions"	The present review focuses on accidental injury and air pollution as the areas of major concern to the health and safety of farm workers as the nation's livestock farms converge into CAFOs.	Workers are vulnerable to pulmonary diseases, and to the main contributors of injury and death on livestock operations, i.e., improper handling of animals and machinery. Protecting worker health proves to be very difficult with the large variability of farm practice, layout, region, and species of animals. Complex mixes of different airborne substances pose a challenge to regulation, particularly…	The two main contributors of documented injury (fatal and non‐fatal) are related to accidents with machinery and animals. These types of accidents are well documented; however, recommended safety strategies continue to be studied to reduce the risks and numbers of injuries associated with both machines and animals. Aside from the hazards of machine‐ and animal‐related injuries, increased air poll…	Highlighted aspects that may compose new studies are long‐term studies on the quality of life of organic farmers, social interactions, crop characteristics, certi cation processes, and access to credit. Moreover, the relationship between the elements of this system and public policies was also pointed out as an important gap deserving future studies.
Molocznick	Time of farmers' exposure to biological factors in agricultural working environment	2004	Annals of Agriculture and Environmental Medicine	Public Health Policy	Empirical	Poland	Private farmer's Labour Charter was applied concerning the exposure of a farmer to biological and other factors in the working environment	"Organic agriculture" AND "working conditions"	The aim of the present study was the recognition of farmers’ time exposure to biological factors on the background of other hazards present in agricultural working environment.	Working time of farmers on private farms generally exceeds the legal working time, irrespective of the type of production. 1) Agricultural work is most often accompanied by several hazards at the same time, which may determine the type and intensity of the body reaction among workers exposed. 2)Dust, elements of the thermal environment and biological agents, occur most frequently and create risk …	Exposure to hazardous factors in agricultural working environment is due to contact with plants, animals and organic wastes, more precisely ‐ with microbes, plant and animal particles present in aerogenic agricultural dust, as well as pathogens of contagious and invasive diseases present in contaminated soil, water and plants. The ‘Private Farmer’s Labour Charter’ was applied in order to obtain d…	While this study could not consider potential biases from the farmers’ existing health status at the time of switching to organic produc‐ tion and other sources, it is clear that greater attention needs to be paid to improving worker health, safety, and wellness in organic farming.
Pergola et al.	Sustainability evaluation of Sicily's lemon and orange production: Anenergy, economic and environmental analysis	2013	Journal of Enviromental Management	Management studies	Empirical	Italy	Life cycle assessment	"Organic agriculture" AND "wages"	The aim of our study was to evaluate the sustainability of organic farming methods compared to conventional methods through an energy, environmental and production cost analysis of the whole production cycle of lemon and orange orchards (from orchard establishment to the end of the crop cycle).	The results, based on unit surface area (ha) production, prove the stronger sustainability of the organic over the conventional system, both in terms of energy consumption and environmental impact, especially for lemons. The sustainability of organic systems is mainly due to the use of environmentally friendly crop inputs (fertilizers, not use of synthetic products, etc.). In terms of production …	The island of Sicily has a long standing tradition in citrus growing. We evaluated the sustainability of orange and lemon orchards, under organic and conventional farming, using an energy, environmental and economic analysis of the whole production cycle by using a life cycle assessment approach.
Pissionnier et al.	A simulation tool to support the design of crop management strategies in fruit tree farms. Application to the reduction of pesticide use	2017	Computers and Electronics in Agriculture	Food Technology Assessment	Empirical	France	Evaluation of a simulation tool called CoHort and built in Excel	"Organic agriculture" AND "Employment conditions"	The support approach using CoHort aims to enhance farmers’ reflections regarding their strategic projects by quantifying the potential consequences on farm performance of systemic changes in their production systems, such as the introduction of new equipment or a reorientation of activities. To do so, a technician or researcher works with individual farmers in a face‐ to‐face process to design sc…	The first farmer wanted to convert five hectares out of eight to organic production. Simulations showed that the raw margin was increased by 259%, the Treatment Frequency Index was reduced of 26%, but the labour demand was 9% higher. The second farmer wanted to replace 1.5 hectares out of 15 ha with a new scab‐resistant cultivar. Results showed that the average TFI at the farm scale was decreased…	Strategic decisions condition the orientation and associated agricultural practices of farms for many years, especially in fruit production where trees are planted for ten to fifteen years. However, this type of decision is rarely addressed in decision support approaches. An approach was developed to support strategic thinking in fruit tree farms through the use of a simulation tool called CoHort…	The tool flexibility allows using it with different farm structures and projects.
Raakauskene et al.,	Strategic guidelines of increasing employment and reducing unemployment in the context of EU (Lithuanian case)	2015	Transformation in Business & Economics	Public Policy	Narrative Review	Lithuania	Narrative Review	"Organic farming" AND "employment"	The purpose o f the article is to provide strategic guidelinesfor increasing employment and reducing unemployment in Lithuania with regard to the EU strategic documents in thefield of employment, the European Commission’s communiquis, the European Council decisions, studies, recommendations to Member States made by the International Labour Organization	The paper presents and analyses the present situation in the EU labour market; the present situation is without precedent throughout the total historical period of the EU’s existence. The most pressing problems of the labour market in Lithuania (unemployment of young people, long‐term unemployed, and women) are brought in this context, and their fundamental causes are disclosed. The scenarios o f…	Sadly, green jobs are far from being mostly fair jobs as they are often involving serious occupational health hazards and often generating less than living wages and incomes.	The article states that the employment‐friendly macroeconomic policy‐making is afundamental strategic guideline in order to address the problems of employment and social economic inequality. It is necessary to implement the macro‐ economic policies aimed at full employment in Lithuania; the macro‐economic policies should ensure dignifiedjobs and expand the employment opportunities, foster to adop…
Renner et al.	Green jobs: Working for people and the environment	2008	Worldwatch Paper	Public Policy	Narrative Review	EU countries	Narrative Review	"Organic agriculture" AND "Employment conditions"	The paper presents some of the main aspects of the debate around green jobs as their number is on the rise. It explores various sectors (energy, construction, transport and agriculture). The aim is therefore to give an overiew of the main aspects of the green transition and to explore the elements that can ensure this can also be a just transition	Agroforestry, which combines tree planting with traditional farming, offers significant environmental benefits in degraded areas ‐ including carbon sequestration. Some 1.2 billion people already depend on it to some extent. There is additional job potential in efforts to adapt to, and cope with, climate change. Building flood barriers, terracing land, and rehabilitating wetlands is labor‐intensiv…	Indeed, the fruit industry first came up with the principles of intensive production systems to enhance market competitiveness, of integrated production (IFP, a logical outcome of integrated pest management, IPM,) stewardship of the environment and consumer health, and of organic farming, which is a tough test of growers’ good faith and guidelines but also instils greater trust in consumers. On o…	The potential for green jobs is immense. But much of it will not materialize without massive and sustained investments in the public and private sectors. Governments need to establish a firm framework for greening all aspects of the economy, with the help of targets and mandates, business incentives, and reformed tax and subsidy policies. It will also be critical to develop innovative forms of te…
Sansavini	The role of research and technology in shaping a sustainable fruit industry: European advances and prospects	2006	Revista Brasilera de Fruticultura	Public Policy	Narrative Review	EU countries	Narrative Review	"Organic agriculture" AND "working conditions"	Our modern fruit industry needs on one hand to blend and make compatible, while keeping a competitive edge in a global marketplace, its intensive, specialized production systems with the stewardship of its ecosystems by enhancing biological diversity, cutting energy inputs and reducing environmental impact. These issues on the other hand must also be responsible to the increasingly pressing deman…	The fruit industry stands on the verge of global challenges increasingly focused on supply lines both of highly differentiated fresh products marked by quality, genuineness, flavour, tipicity, origin, new packaging, and of high‐tech processed derivatives. Indeed, it will no longer be product price alone that decides the success and survival of the fruit industry and its growers. From now on the a…	The alternative food movement encounters many structural conditions as it strives toward more environmentally sustainable and socially just agrifood systems. One of the greatest challenges the movement faces is not turning its back on migrant farmworkers at the same time it creates and experiments with alternative agricultural models	There is no doubt that Brazil can boost its export profile to Europe not only for orange and other tropical fruits (I think it’s top‐ ranked in juice concentrates) but also for temperate fruits if it keeps in mind four priorities that Europe holds as standard procedure: Economic, social, environmental sustainability of production systems by promoting the growing districts that are best suited to …
Sbicca	Farming while confronting the other: the production and maintenance of boundaries in the borderlands	2015	Journal of Rural Studies	Public Policy	Empirical	EU countries	Ethnography and in-depth semi-structured interviews	"Organic agriculture" AND "farmwork"	This article explains why there is a gap between an expressed concern with the inequalities faced by migrant farmworkers and the actual advocacy practices necessary to overcome them	in the course of farming in the context of border politics, food activists internalize a number of structural and ideological conditions producing a racialized agricultural political economy, neoliberalism, and the security state. These include the hegemony of certain stereotypes of migrant farmworkers and inherent notions of difference, the hegemony of militarized borders and monitored immigrant…	The issues of nutritional insecurity and hunger especially in developing countries have realized the need for sus‐ tainable agriculture production with quality and environmental safety products. Besides this, the problem of land degradation and shrinkage of cultivable land areas have exaggerated the issues of agricultural sector across the world. Earlier it was believed that organic production is…
Shubha et al.	Organic vegetable production and its impact on soil, environment and society	2021	Advances in Organic Farming (book)	Agronomy	Descriptive Review	EU Countries	Descriptive Review	"Organic farming" AND "employment conditions"	Provide an overview of the state of organic vegetable production impacts on soil, environment and society	Organic farming requires more labor and it promotes employment opportunity for rural youths. Organic Farming can make a major contribution to rural vitality. The problem‐solving and self‐ reliance abilities of practicing organic farming are important here to maintain rural vitality.	Critics of the concept of sustainable daveleopment as it produced a transformation in the environmental discourse leading to a more inclusive approach to living with nature and with each other and the “need for a radical change	Organic farming helps in saving government money on fertil izer import and subsidy. This money can be utilized for welfare of society. It helps in biodiversity conservations and promotes ecotourism which will further.
Siddique et al.	Organic farming: the return to Nature.	2014	Improvement of crops in the Era of Climatic Changes (book)	Public Policy	Descriptive Review	EU Countries	Descriptive Review	"Organic farming" AND "employment conditions"	Explore the main characteristics of orgnic farming. Is a very descriptive article.	1. still sufficient room for improvement in terms of sustainability goals in the EU. 2. economic, social ad environmental dimension of sustainability registered a different evolution among the EU member states across the 2006‐2019 period with the development patterns put into practice differing in the EU. 3. Dimension of sustainability were closely linked to each other along the analyzed countrie…		Today, the organic agriculture sector is one of the fastest growing food segments, thrust to which is provided by many factors like introduction of policies that prove to be encouraging for organic agriculture, taking away of government funding on agricultural inputs, controversial debate on genetic modification related to food safety and crisis aggravated by foot and mouth and mad cow diseases a…
Ulman et al.	Environmental performances in EU Countries from the perspectives of its relation to Human and Economci Wellbeing.	2021	International Journal of Environmental Research and Public Health	Sustainable development practices	Empirical	EU Countries	Data analysis from the Sustainable Society Index	"Organic farming" AND "employment conditions"	1)Compare the national levels between 2006 and 2019 in the EU member states to establish national perspectives in terms of differences between performances regarding the three sustainability dimension; similarities among countries and evolution of these changes. 2)Observation of possible changes 3)Observation of migration of clusters from one country to another one. 4)Nature and influence of econ…	Farmers participating in organic practice and programs are operating under specific motives, which are in various ways derived from organic ideology, in spite of the absence of this tradition of farming in the Czech Republic. Moreover, the constructivist approach shows that organic farming takes different forms from the farmers‟ perspectives and views, resulting in different styles of organic far…		Attention to the fact that the patterns of development applied in the European context seem to have results capable of strengthening the sustainable goals, but not sufficient for proving that the traditional growth oriented model has been exceeded or that a path has been drawn to a new economic development one.
Zagata	How organic farmers view their own practice: results from the Czech Republic	2010	Agriculture and Human Values	Sustainable development practices and Psychology	Empirical	Czech Republic	Q methodology aimed at the identification of the collectively-shared perspectives belonging engaged actors	"Organic agriculture" AND "occupation"	This paper addresses the development of organic agriculture in the Czech Republic, which is seen as a success story among post‐ communist countries. The goal of this study was to find out how farmers view their own practice, interpret its symbolic value, and construct its content.		This empirical study uses the Q methodology aimed at the identification of the collective and shared perspectives belonging to engaged actors. Data were gathered among Czech farmers registered in official organic scheme and the analysis emphasized three components which are considered as three distinct perspectives possessed by organic farmers. Each viewpoint entails a different understanding of …	The presented classification of the farmers holding the viewpoints contributes to the ongoing theoretical discussion regarding the nature of the current organic sector, its development and potential conventionalization.
